## Down-regulation of C12orf59 is associated with a poor prognosis and VHL mutations in renal cell carcinoma

Jun Xie<sup>1,2,\*</sup>, Chuangzhi Zhu<sup>2,\*</sup>, Jianting Wu<sup>1,2</sup>, Cailing Li<sup>2</sup>, Liya Luo<sup>1</sup>, Lingling Xia<sup>1</sup>, Xianxin Li<sup>2</sup>, Yaoting Gui<sup>2</sup>, Zhiming Cai<sup>1</sup>, Zesong Li<sup>1</sup>

<sup>1</sup>Shenzhen Key Laboratory of Genitourinary Tumor, Shenzhen Second People's Hospital, First Affiliated Hospital of Shenzhen University, Shenzhen 518035, China

<sup>2</sup>Peking University Shenzhen Hospital, Shenzhen 518036, China

\*These authors have contributed equally to this work

Correspondence to: Zesong Li, e-mail: lzssc@yahoo.com

Keywords: renal cell cancer (RCC), C12orf59, von Hippel-Lindau (VHL), prognosis, survival

Received: November 06, 2014

Accepted: December 26, 2015

Published: January 07, 2016

### ABSTRACT

**C12orf59 is newly identified gene in kidney. However, the relation of C12orf59 expression and clinic features is unknown. Here, our study showed that C12orf59 was broadly expressed in normal human tissues with high expression levels in kidney while its expression is beyond detectable in a panel of cancer cell lines. C12orf59 expression in RCC was significantly decreased compared with corresponding adjacent noncancerous tissues ( $P < 0.01$ ). The decreased C12orf59 expression was correlated with lymph node status ( $P < 0.05$ ), distant metastases ( $P < 0.05$ ), poor survival ( $P < 0.001$ ) (HR 3.00; 95% CI, 1.29–7.53), VHL non-sense mutations or frame-shift mutations ( $P < 0.01$ ), and UMPP gene non-sense mutations or frame-shift mutations ( $P = 0.01$ ). Thus, we propose that the decreased C12orf59 expression status is a prognostic biomarker of ccRCC and cooperates with the loss of VHL all the while promoting renal carcinogenesis.**

### INTRODUCTION

Renal cell carcinoma (RCC), the third most common malignancy of the genitourinary system, accounts for 3% of all adult malignancies [1]. The incidence of RCC is increasing in most areas of the world for which statistics are available for recent decades [2, 3]. Localized RCC is potentially curable with surgical resection of the diseased tissue, but 30% of patients develop metastatic disease after surgery. Metastatic RCC remains largely incurable due to its resistance to chemotherapy and radiation [4]. The median survival rate of metastatic RCC patients is 1.5 years, and the five-year survival rate is less than 10% [5].

Clear cell renal cell carcinoma (ccRCC) is the most common subtype of RCC, accounting for 60 to 80% of all RCCs [6]. The loss of function of the von Hippel-Lindau (VHL) tumor suppressor gene characterizes ccRCC [7–9]. VHL is a multifunctional protein that acts as an adaptor for different molecular and subcellular complexes. The best-characterized function of VHL is its role as the substrate recognition component of the E3 ubiquitin protein ligase complex that targets the  $\alpha$ -subunit of the hypoxia-inducible factor (HIF) for proteolytic degradation

destruction [10]. In ccRCC, the loss of VHL leads to up-regulation of HIF- $\alpha$ -mediated transcriptional programs that favor metastatic processes [11].

Recent studies identified several new ccRCC genes, including *UTX*, *JARIDIC*, *SETD2*, and *BAP1* [12–16]. These studies have heralded a marked expansion in our understanding of the genetic landscape of ccRCC. However, the underlying molecular mechanisms of renal carcinogenesis remain unclear. It is still necessary to identify new signature genes and specific biomarkers in order to provide potential targets for RCC early detection. Furthermore, these targets will allow surveillance of tumor progression, and prediction of patient prognoses [17–21].

The *C12orf59* gene (Chromosome 12 open reading frame 59, also termed *FLJ31166* [22] or *MGC111385* [23]), localized on Chromosome 12p13.2, was first cloned in 2002 [23]. The open reading frame spans 12,847 bp, consists of 5 exons, and has 7 transcripts. Human *C12orf59* mRNA was associated with the RNA-binding protein HuR [24] and was predicted to encode transmembrane proteins [26]. The classical *C12orf59* mRNA (NM\_153022.2) is 2800 bp long and encodes a 163 amino acid protein with a calculated relative molecular mass of approximately

18 kDa (NP\_694567.1) [26]. Recently study indicated that the expression of *C12orf59* was decreased in RCC [27]. However, the expression and physiological roles of *C12orf59* have not been investigated to date.

Here, we report that *C12orf59* is frequently decreased at the mRNA and protein levels in a panel of genitourinary cancer cell lines and ccRCC. We found that the decreased *C12orf59* expression is associated with renal cell carcinoma clinico-pathological parameters. Therefore, *C12orf59* protein level change might be used for clinic marker for RCC early detection, surveillance of tumor progression, and prediction of patient prognoses.

## RESULTS

### Tissue distribution of *C12orf59* and localization of *C12orf59*

*C12orf59* is newly identified gene. However, its tissue distribution and subcellular location remains unclear. Our results showed that *C12orf59* mRNA was broadly expressed in the majority of the human normal tissues detected, but it was most highly expressed in the kidney (Figure 1A). Immunofluorescence staining showed that *C12orf59* was located in the cytoplasm (Figure 1B). Furthermore, cytoplasmic and nuclear extracts were obtained from renal cancer cells stable transfected *C12orf59* expression lentivirus. The western blot results showed that the *C12orf59* protein was primarily detected in the cytoplasm fractions, with no detectable *C12orf59* protein in the nuclear fractions (Figure 1C).

### Loss of *C12orf59* expression in the RCC cell lines and ccRCC

To test the expression status of *C12orf59* in the cancer cell lines, we performed a RT-PCR analysis on a panel of genitourinary cancer cell lines (five renal cancer cell lines: ACHN, Caki-1, 769-P, OS-RC-2 and 786-0; two bladder cancer cell lines: T24 and 5637; three prostate cancer cell lines: PC3, LNCaP and DU145). Our results demonstrated that no detectable *C12orf59* mRNA was observed in these cancer cell lines (Figure 2A). This result was confirmed by western blot analysis (Figure 2B).

We previously analyzed the expression profile of ccRCC using deep sequencing technology and revealed that *C12orf59* was decreased in a majority of the ccRCC samples compared to the paired non-tumor tissues [27]. To investigate whether *C12orf59* expression is altered during carcinogenesis, we performed an *in silico* analysis of *C12orf59* expression in human normal kidney tissues and ccRCC using microarray expression studies published in Oncomine(31). Two independent studies showed that the *C12orf59* expression was significantly decreased in the ccRCC samples compared with the normal

tissues ( $p < 0.01$ ) (Figure 2C) [28, 29]. We analyzed the expression of *C12orf59* in additional 40 paired ccRCC samples and non-tumor tissues. The results showed that the *C12orf59* mRNA levels were silenced or strongly decreased in 33 of the 40 ccRCC samples with an overall 4.5-fold decrease in ccRCC compared to the paired non-tumor tissues ( $P < 0.001$ ) (Figure 2D). The results were confirmed by western blotting (Figure 2E). IHC staining for *C12orf59* protein expression in matched tumor and normal tissue confirmed the results and decreased expression in tumor samples across all stages (Figure 2F).

### Loss of *C12orf59* is correlated with tumor stage, metastasis and poor prognosis

We examined the possible correlations between the expression levels of *C12orf59* and the clinical features of ccRCC in 208 primary ccRCC samples. As summarized in Table 1, the patients were assigned to two subgroups according to the expression levels of *C12orf59*: the low expression group ( $n = 114$ ) and the high expression group ( $n = 94$ ). The *C12orf59* low expression group showed more frequent regional lymph node metastases ( $P = 0.04$ ), distant metastases ( $P = 0.016$ ) and late tumor stage ( $P = 0.014$ ) development than the high expression group. The Spearman correlation analysis (Supplementary Table S2) showed that the *C12orf59* expression level was significantly inversely correlated with regional lymph node metastases ( $P = 0.14$ ,  $P = 0.04$ ), distant metastases ( $P = 0.17$ ,  $P = 0.02$ ), and late tumor stage ( $P = 0.17$ ,  $P = 0.01$ ). No significant correlations between the expression levels of *C12orf59* with age, gender and tumor size were observed (Table 1, Supplementary Table S2).

We examined the correlation between the expression status of *C12orf59* and the ccRCC prognosis using 122 of the 208 primary ccRCC samples with available follow-up data. As shown in the overall survival curve, the patients in the *C12orf59* low expression group (five year survival rate, 52.5%) had a significantly poorer prognosis than those in the *C12orf59* high expression group (78.9%,  $P < 0.001$ ; Figure 3). The median survival time for the patients in the *C12orf59* low expression group was 50.1 months as compared to 91.4 months for those in the *C12orf59* high expression group.

The univariate analysis of the overall survival revealed that the relative level of *C12orf59* expression, primary tumor stage, the regional lymph node metastases and distant metastases were prognostic predictors (Table 2). The variables with a  $P$  value  $< 0.05$  were selected for the multivariate analysis. The multivariate analysis showed that the relative level of *C12orf59* expression, the primary tumor stage, and distant metastases were independent prognostic predictors. The patients with high *C12orf59* protein levels in the tumors had a better prognosis than the patients with low *C12orf59* protein levels (RR:  $-1.40$ , 95% CI:  $0.11-0.57$ ,  $P = 0.009$ ; Table 2).

**Genetic deletion or mutation of *C12orf59* is not detected in renal cancer cell lines or primary renal cancer tissues**

To determine whether genetic alterations contribute to the silencing of *C12orf59*, we performed sequence screening on the exons and exon-intron junctions of

*C12orf59* in 5 renal cancer cell lines and 100 paired ccRCC samples using PCR and direct sequencing. The results showed no somatic mutations/deletions of *C12orf59* in the five human renal cancer cells and the 100 paired ccRCC samples, suggesting that the decreased *C12orf59* expression might not be caused by genetic alterations.

A

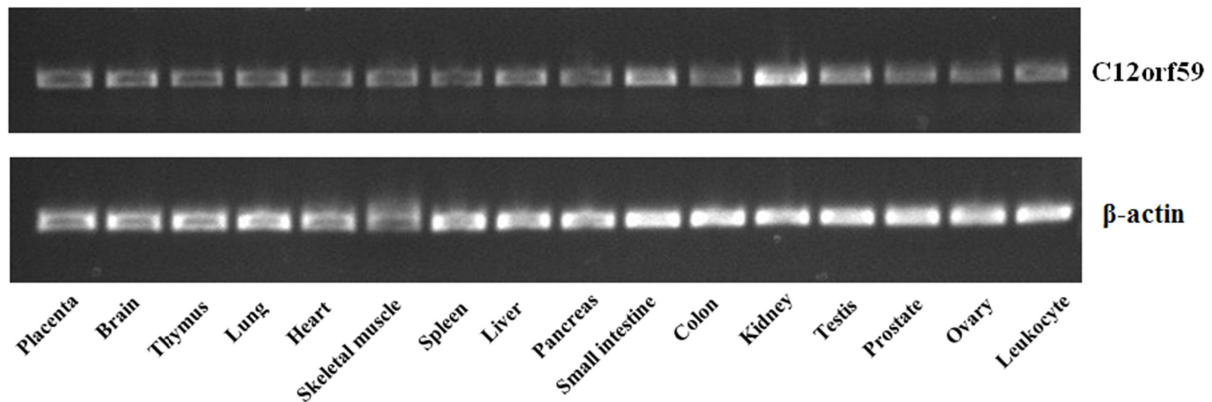

B

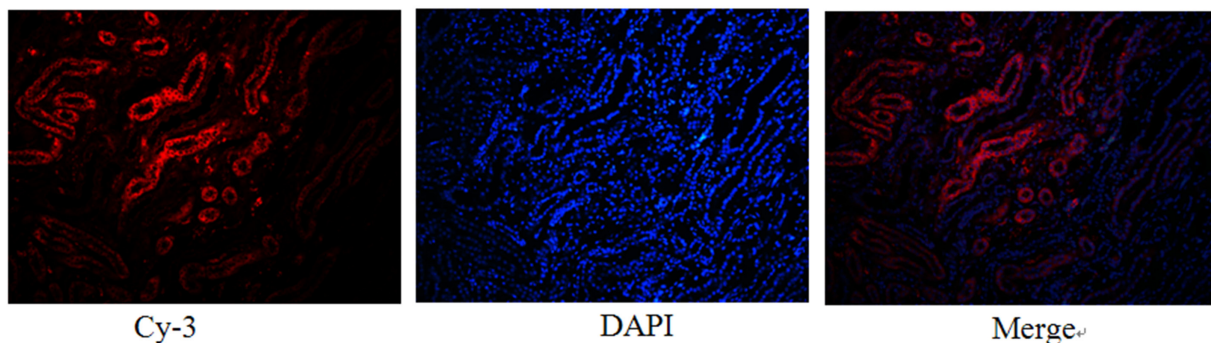

C

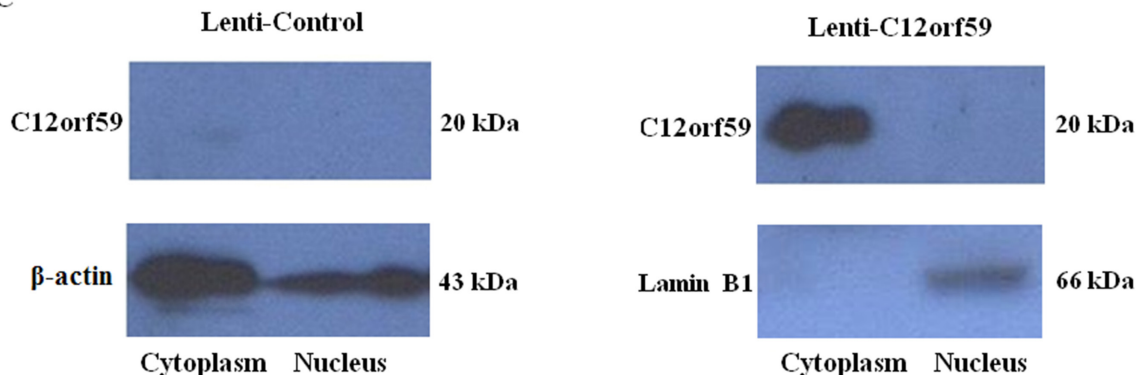

**Figure 1: Tissue distribution of *C12orf59* mRNA expression and subcellular localization of the *C12orf59* protein in kidney tissues.** (A) The *C12orf59* mRNA levels were analyzed in a panel of human adult tissues using RT-PCR.  $\beta$ -actin was used as a loading control. (B) Immunofluorescence staining captured by fluorescence microscope, including Cy-3, DAPI, and merged images. The *C12orf59* protein was observed mainly in the cytoplasm. (C) Cytoplasmic and nuclear extracts were obtained from ACHN cells transfected with a lentiviral vector-encoding *C12orf59* for western blot analysis, and the *C12orf59* protein was detected primarily in the cytoplasm fractions, with no detectable *C12orf59* protein in the nuclear fractions.

**Table 1: Correlation between C12orf59 expression and the clinico-pathologic features of patients with clear cell renal cell carcinoma**

| Clinico-pathologic variables | No. of cases | C12orf59 expression |      | $\chi^2$ | <i>p</i> |
|------------------------------|--------------|---------------------|------|----------|----------|
|                              |              | low                 | high |          |          |
| All cases                    | 208          | 114                 | 94   |          |          |
| <b>Gender</b>                |              |                     |      |          |          |
| Male                         | 138          | 81                  | 57   | 2.503    | 0.114    |
| Female                       | 70           | 33                  | 37   |          |          |
| <b>Age</b>                   |              |                     |      |          |          |
| > 50                         | 120          | 71                  | 49   | 2.176    | 0.140    |
| < 50                         | 88           | 43                  | 45   |          |          |
| <b>Size</b>                  |              |                     |      |          |          |
| > 7 cm                       | 49           | 24                  | 25   | 0.879    | 0.348    |
| < 7 cm                       | 159          | 90                  | 69   |          |          |
| <b>Primary tumor stage</b>   |              |                     |      |          |          |
| T1–2                         | 171          | 87                  | 84   | 5.996    | 0.014    |
| T3–4                         | 37           | 27                  | 10   |          |          |
| <b>Lymph node status</b>     |              |                     |      |          |          |
| N0                           | 190          | 100                 | 90   | 4.198    | 0.040    |
| N+                           | 18           | 14                  | 4    |          |          |
| <b>Distant metastasis</b>    |              |                     |      |          |          |
| M0                           | 194          | 102                 | 92   | 5.789    | 0.016    |
| M1                           | 14           | 12                  | 2    |          |          |

**C12orf59 expression is correlated with mutations of the genes encoding the ubiquitin-mediated proteolysis pathway (UMPP)**

As the mutation status of exons was known for 86 ccRCCs [30], we investigated whether C12orf59 expression is correlated with the mutation status of the genes encoding the ubiquitin-mediated proteolysis pathway (Supplementary Table S3). We determined that the fraction of UMPP mutated tumors in the C12orf59 low expression group (30/49, 61%) was similar to that in the C12orf59 high expression group (15/37, 41%) (Supplementary Table S3), but the fraction of frame-shift mutations and non-sense mutations were more frequent in the C12orf59 low expression group than that in the C12orf59 high expression group (39% vs. 11%, *p* = 0.006). The fraction of the *VHL* mutated tumors, including whole mutations or frame-shift mutations and non-sense mutations, in the C12orf59 low expression group were more frequent than in the C12orf59 high expression group (41% vs. 19%, *p* = 0.036; 33% vs. 8%, *p* = 0.008) (Figure 4 and Supplementary Table S4). These results indicate that there is a significant correlation between the lack of C12orf59 expression and the *VHL* and UMPP mutations.

**C12orf59 expression is not correlated with mutations of the chromatin remodeling genes**

Due to recent sequencing efforts have identified frequent mutations of chromatin remodeling and histone-modifying genes in ccRCC [12, 14, 30], we analyzed whether C12orf59 expression is associated with the mutation status of these genes (Supplementary Table S5). The results showed that the mutation fraction of the chromatin remodeling genes in the C12orf59 low expression group (22/49, 44.9%) and in the C12orf59 high expression group in ccRCC (18/37, 48.6%) was similar, and the fraction of frame-shift mutations and non-sense mutations were similar (34.7% vs. 35.1%). These data indicate that the lack of C12orf59 expression is not correlated with mutations of the chromatin remodeling genes.

**C12orf59 expression is not correlated with HIF1 $\alpha$  and HIF2 $\alpha$  in ccRCC**

Because the HIF1 $\alpha$  and HIF2 $\alpha$  protein levels were known for the 86 ccRCC samples [30], we evaluated the potential correlations between the protein expression patterns of C12orf59, HIF1 $\alpha$  and HIF2 $\alpha$  in ccRCC. As shown in Figure S2, 59.4% (22/37) of the tumors in the



**Table 2: Univariate and multivariate analyses for overall survival**

| Clinico-pathologic variable            | Univariate analysis |            |            | Multivariate analysis |           |         |
|----------------------------------------|---------------------|------------|------------|-----------------------|-----------|---------|
|                                        | RR                  | 95.0% CI   | P value    | RR                    | 95.0% CI  | P value |
| Gender (male/female)                   | 0.57                | 0.72–4.31  | 0.216      | –                     | –         | –       |
| Age (>/< 50 years)                     | -0.002              | 0.49–2.04  | 0.995      | –                     | –         | –       |
| Size (>/< 7 cm)                        | -0.52               | 0.33–1.07  | 0.082      | –                     | –         | –       |
| Primary tumor stage (T1–2/T3–4)        | 1.37                | 1.92–8.10  | < 0.001*** | 0.94                  | 1.11–5.92 | 0.028*  |
| Lymph node status (negative/positive)  | 1.49                | 2.0–9.92   | < 0.001*** | 0.59                  | 0.71–4.54 | 0.231   |
| Distant Metastasis (negative/positive) | 1.59                | 2.06–11.61 | < 0.001*** | 1.31                  | 1.48–9.28 | 0.005** |
| C12orf59 (low/high)                    | -1.40               | 0.11–0.57  | 0.001**    | -1.18                 | 0.13–0.74 | 0.009** |

Abbreviations: RR; Relative risk, CI; Confidence interval, \* $P < 0.05$ , \*\* $P < 0.01$ , \*\*\* $P < 0.001$

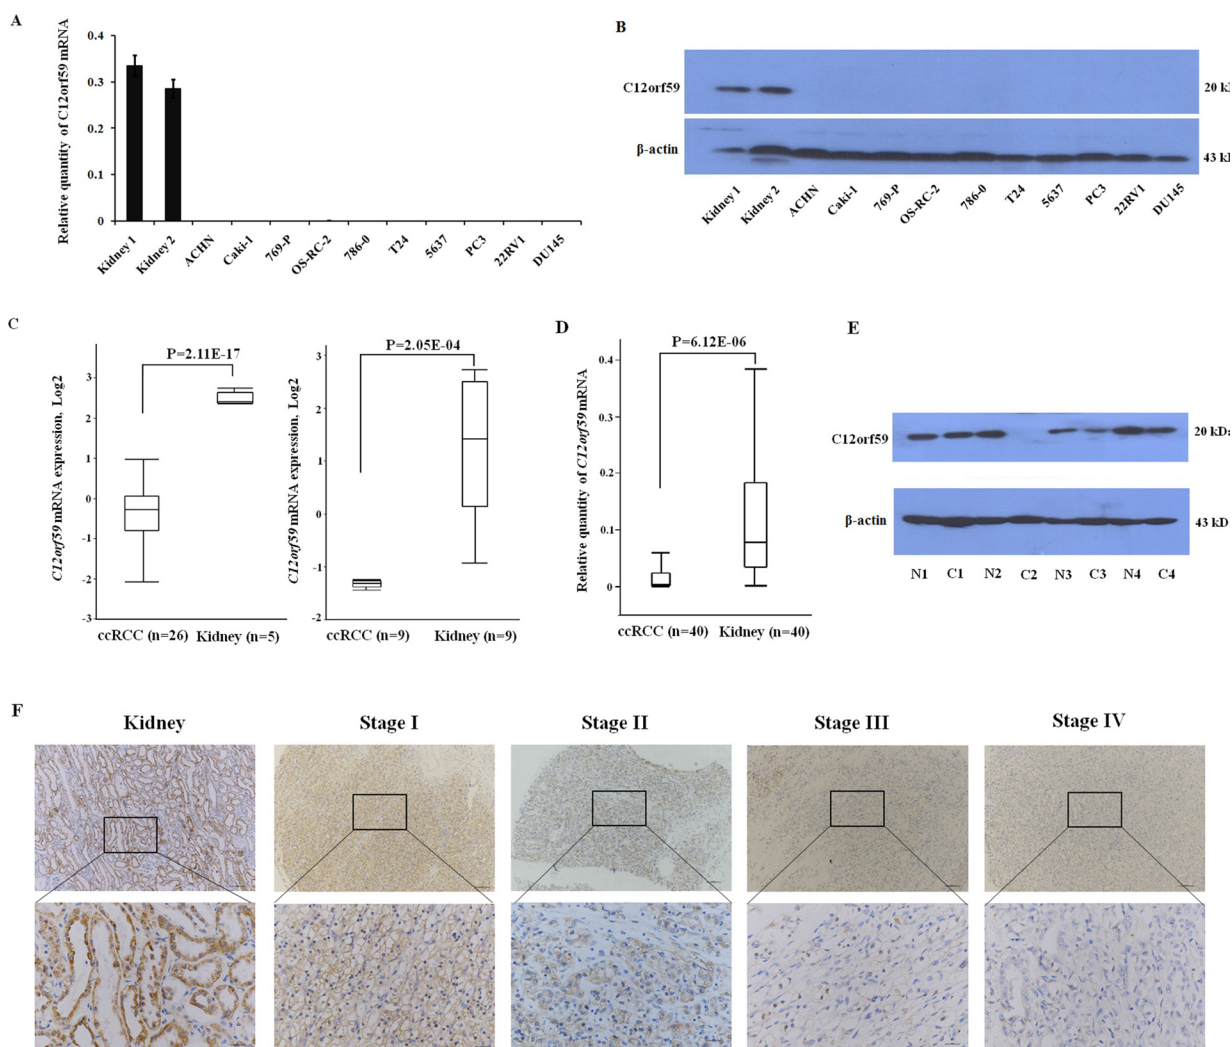

**Figure 2: C12orf59 is down-regulated in ccRCC.** (A) The quantitative assessment of *C12orf59* mRNA levels by real-time PCR in normal kidney tissues, renal cancer cell lines (ACHN, Caki-1, 769-P, OS-RC-2, 786-0), bladder cancer cell lines (T24, 5637), prostate cancer cell lines (PC3, LNCaP, DU145). The data are shown as the mean  $\pm$  S.D. for three independent quantifications. (B) The C12orf59 protein in these genitourinary cancer cell lines was detected by western blot. (C) Oncomine was used to analyze the microarray data previously published by Yusenko [28] (left) and Lenburg [29] (right) using standard settings. (D) The expression of *C12orf59* in 40 ccRCC and paired noncancerous tissue samples are determined by real-time RT-PCR ( $P < 0.0001$ ). (E) Representative results for the C12orf59 protein in ccRCC and paired noncancerous tissue samples by western blot. (F) Representative immunohistochemical staining for C12orf59 expression in patient normal and ccRCC tissue stage I to IV.

C12orf59 high expression group were HIF1 $\alpha$  positive, and 26.5% (13/49) of the tumors in the low expression group were HIF1 $\alpha$  negative (Supplementary Figure S2). The correlation between the expression of C12orf59 and HIF1 $\alpha$  was not significant ( $P = 0.24$ ). In addition, 78.4% (29/37) of the tumors in the C12orf59 high expression group were positive for HIF2 $\alpha$ , and 32.6% (16/49) of the tumors in the C12orf59 low expression group were HIF2 $\alpha$  negative (Supplementary Figure S2). The correlation between the expression of C12orf59 and HIF2 $\alpha$  was not significant ( $P = 0.33$ ). Thus, there was no correlation between the expression of C12orf59 and that of HIF1 $\alpha$  and HIF2 $\alpha$ .

## DISCUSSION

We found that the *C12orf59* gene was expressed in almost all the tissues, with the highest levels of expression found in the kidney, and that C12orf59 is predominantly a cytosolic protein (Figure 1B and 1C). The C12orf59 protein is highly conserved among humans, chimpanzees, cows, pigs, mice and rats (Supplementary Figure S1). This ubiquitous expression and conserved sequences of C12orf59 suggested that it might have an important role in the regulation of cell progression.

Our previous study showed that *C12orf59* was decreased in a small cohort of ccRCC samples [27]. In the present study, we found that the expression of C12orf59 was lacking in a panel of genitourinary cancer cell lines

(Figure 2A and 2B). By using the *silico* gene expression data screening Oncomine database [31], we confirmed that the *C12orf59* expression in ccRCC is decreased compared with normal tissues (Figure 2C). The results were validated by analyzing the expression of *C12orf59* in 40 ccRCC samples and paired noncancerous tissues (Figure 2D and 2E).

To investigate whether C12orf59 expression is correlated with the progression of ccRCC, the C12orf59 expression levels and the clinical pathological characteristics of 208 patients with ccRCC were compared by immunohistochemistry. The results showed that the decreased *C12orf59* expression is significantly correlated with the primary tumor stage, lymphatic invasion ( $R = 0.14$ ,  $P = 0.04$ ), and distant metastases ( $R = 0.17$ ,  $P = 0.02$ ) (Table 1), suggesting that decreased C12orf59 expression might be important for the acquirement of malignancy potential in ccRCC. The multivariate analysis revealed that the decreased *C12orf59* expression was a worse independent prognostic factor in ccRCC patients (Figure 3 and Table 2). To our knowledge, this report is the first to demonstrate that *C12orf59* has prognostic value as an immunohistochemical biomarker of patient survival in human cancer.

The genetic mechanism of the decreased expression of C12orf59 was investigated by direct sequencing of the gene promoter and exons. No somatic mutations/deletions of *C12orf59* in the five human renal cancer cell lines and 100-paired ccRCC samples were identified. Whether

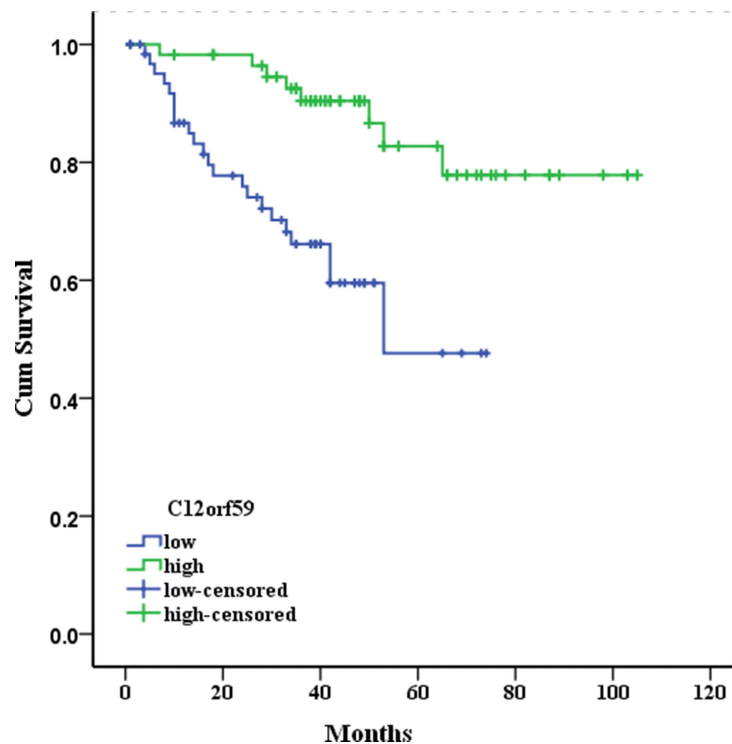

**Figure 3: Kaplan-Meier survival curves for 122 patients with clear cell renal cell carcinoma according to C12orf59 expression.** The cumulative 5-year survival rate was 78.9% in the high protein expression group ( $n = 57$ ) and 52.5% in the low C12orf59 expression group ( $n = 65$ ) ( $P < 0.001$ ).

molecular mechanisms other than mutations, such as promoter hypermethylation, might contribute to *C12orf59* silencing remains unknown, but the possibility might reflect genetic and epigenetic events and needs further exploration.

Our analysis revealed that low *C12orf59* expression is significantly correlated with the mutation status of genes encoding the ubiquitin-mediated proteolysis pathway, especially with the *VHL* mutation, but not with mutations of the chromatin remodeling genes. *C12orf59* expression is not correlated with HIF1 $\alpha$  or HIF2 $\alpha$ , two crucial hypoxia regulatory factors, which were the most intensively investigated *VHL* target genes. These

data suggest that *C12orf59* expression is not inhibited by the canonical hypoxia pathway. This raised the possibility that the decrease of *C12orf59* expression may be provoked by the loss of *VHL* in a HIF-independent fashion by the same mechanism that *VHL* influence the p53 expression [32]. We speculated that, in some instances, the decreased *C12orf59* expression and the loss of *VHL* might cooperate to promote the development of ccRCC because *VHL* inactivation alone is insufficient for tumor initiation [33, 34].

In a word, our data provides the first evidence that the loss of *C12orf59* expression is a common feature of

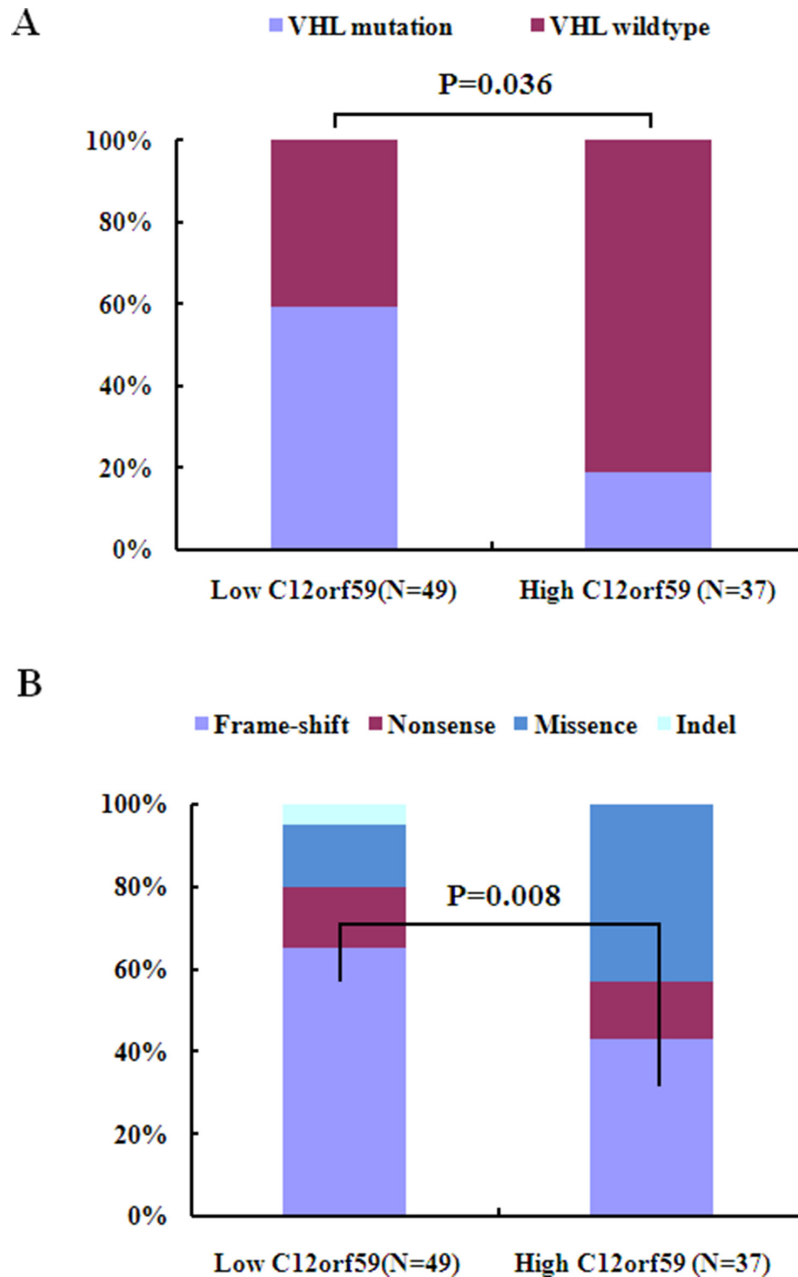

**Figure 4: *C12orf59* expression is associated with *VHL* mutation in 88 ccRCC samples. (A) The *VHL* mutation frequency in the *C12orf59* low expression group and the *C12orf59* high expression group. (B) The distribution of *VHL* mutation types in the *C12orf59* low expression group and the *C12orf59* high expression group.**

ccRCC that is correlated with increased aggressive tumor behavior and predicts poor survival outcomes of patients. Decreased *C12orf59* expression and the loss of VHL may cooperate to promote renal carcinogenesis.

## MATERIALS AND METHODS

### Cell culture

The human renal cell carcinoma cell lines (786-O, OS-RC-2, ACHN, 769-P, and Caki-1), bladder cancer cell lines (T24, 5637), and prostate cancer cell lines (PC3, LNCaP, DU145) were purchased from the American Type Culture Collection (ATCC). All the cell lines were cultured in accordance with the supplier's instructions.

### Construction of lentivirus vector and lentivirus infection

*C12orf59* cDNA was cloned into pGV lentivirus vector (Genechem Incorporation, Shanghai, China). The resulting lentivirus vector together with pHelper 1.0 and pHelper 2 vectors were cotransfected into 293FT cells to generate lentiviral stock, and pGV empty vector served as negative control. Forty-eight hours after transfection, supernatant harboring lentiviruses were collected. ACHN cells were infected by lentiviruses in 6-well plates by applying infection cocktail. After 48 hours, infected cells were selected to expand culture for further investigation by using 2  $\mu\text{g/ml}$  of puromycin. Expression of *C12orf59* was verified by using real-time PCR and Western blotting.

### Tissue samples

Tissue samples from the tumors with matched normal controls were surgically resected at member institutions of the Urinogenital Cancer Genomics Consortium (UCGC) in China as described previously [30]. Of 100 ccRCC and paired normal kidney tissues, only 86 pairs with detailed information were selected for further analysis [30]. An additional 122 paraffin-embedded RCC tissue samples with follow-up data were collected from patients between 1999 through 2007. Each patient had provided written informed consent prior to study participation. This study protocol was carried out with ratification by the Ethics Committee of Shenzhen Second People's Hospital. Of these 208 patients, 138 were men, and 70 were women. The median age of the patients was 53 years (range, 4–83 years). The median follow-up time was 39 months (range, 1–105 months). Information regarding the gender, age, stage of disease, and histopathological factors was obtained from the medical records. All the tumors were confirmed as ccRCC by the clinical pathology department of the hospital, and the cases were staged according to the tumor node metastasis staging system.

### RT-PCR

The levels of *C12orf59* mRNA in different human adult tissues (Human Multiple Tissue cDNA Panels, I and II) were determined by semi-quantitative PCR with *C12orf59* primers and  $\beta$ -actin primers in accordance with the manufacturer's instructions. The levels of *C12orf59* mRNA in the cancer cell lines and the tumor and paired normal tissues were determined by a SYBR Green-based real-time PCR assay with *C12orf59* primers, and  $\beta$ -actin was used as the internal control. The PCR mixture was initially incubated at 94°C for 2 minutes, followed by 40 cycles of denaturation at 94°C for 15 seconds and annealing and extension at 68°C for 30 seconds. The assay was carried out three times in triplicate using the following primer sets: *C12orf59*-F: 5'-CAGCACTCTCCAGAGCACTATCA-3' and *C12orf59*-R: 5'-TGGCTACTGTGAAGCGACTCAT-3';  $\beta$ -actin-F: 5'-GGCACCACACCTTCTACAATGAG-3'; and  $\beta$ -actin-R: 5'-GGATAGCACAGCCTGGATAGCA-3'. The relative expression level of *C12orf59* was determined using the  $2^{-\Delta\Delta C_t}$  method [35].

### Database mining

The Oncomine database [31] was used for retrieving the alterations in the mRNA expression levels in cancers and corresponding disease-free normal and/or normal adjacent tissues.

### Immunofluorescence

For immunofluorescence, the sections were deparaffinized in xylene and rehydrated through graded alcohols, then boiled in 10 mM citrate buffer (pH 6.0) for 30 min for the antigen retrieval. The endogenous hydrogen peroxidase was blocked by treating the slides with 3% hydrogen peroxide and incubating them for 20 min. The section were washed three times in PBS and incubated in TBS containing 5% BSA for 30 min at room temperature. The section were incubated with a 1:200 dilution of rabbit polyclonal anti-*C12orf59* (ABGENT, CA) in 0.5% BSA in PBS overnight at 4°C. The section were washed three times with cold PBS and incubated with a 1:1000 dilution of the secondary antibody donkey anti-rabbit IgG conjugated to Cy3 (EarthOx, USA) in 0.5% BSA in PBS for 1 h at room temperature. After the section were washed three times with PBS and once with water, the nuclei were stained with 4',6-diamidino-2-phenylindol (DAPI) (Sigma, USA). Immunofluorescence was visualized using a fluorescence microscope, and cyanine 3 fluorescence was detected after 100% excitation at 568 nm.

### Western blotting

The tissues or cells were lysed with a RIPA buffer (Sigma, USA) containing protease inhibitors (Sigma, USA).



Protein quantification was performed using a BCA protein assay kit (Pierce, USA), and 30 µg of total protein were separated in a 12% gel by SDS-polyacrylamide gel electrophoresis (SDS-PAGE) and transferred to a PVDF membrane (Hybond-P, Amersham Biosciences Piscataway, NJ, USA). After being blocked with 5% BSA in Tris-buffered saline with 0.1% Tween 20 (TBST) at room temperature for 2 h, the membrane were probed with primary rabbit anti-C12orf59 antibody (ABGENT, CA) at a dilution of 1:2000 in 5% skim milk powder in TBST at 4°C overnight. After being washed three times with TBST buffer, the blots were incubated with horseradish peroxidase (HRP)-conjugated secondary donkey anti-rabbit at a dilution of 1:10000 for 1–2 h. After washed three times with TBST buffer, the blotting signals were visualized with ECL systems (Pierce, Rockford, IL, USA). β-Actin was used as a loading control and was detected with a rabbit mAb (1:1,000 dilution, Novus).

### Immunohistochemistry

Immunostaining of the paraffin-embedded RCC tissue sections was performed by a similar method to that used in our previous work [36]. The sections were deparaffinized and rehydrated, then boiled for the antigen retrieval. The endogenous hydrogen peroxidase was blocked. After being incubated with 10% BSA, the sections were incubated with anti-C12orf59 antibody (HPA036147, Sigma, USA) used at a 1:300 dilution at 4°C overnight. After being washed in PBS, the sections were treated with a MaxVision HRP-Polymer anti-rabbit IHC Kit (Maixin Bio, Fujian, China) and stained with a DAB kit (Maixin Bio, Fujian, China). The expression of C12orf59 was assessed blindly by two independent investigators. The staining of C12orf59 was scored as the product of the staining intensity (on a scale of 0–3: negative = 0, weak = 1, moderate = 2, strong = 3) and the percentage of cells stained (on a scale of 1–5: 1 = 0%–20%; 2 = 21–40%; 3 = 41–60%; 4 = 61–80%; 5 = 81%–100%), resulting in scores ranging from 0 to 15. We defined two subgroups as follows: the low expression group (scores: 0–5) and the high expression group (scores: 6–15) [37].

### Mutational analyses

The genomic DNA was extracted from the cells or tissue specimens using the DNeasy Tissue Kit (Qiagen). The PCR primers were designed to cover all the exons, intron/exon junctions, proximal promoter and exon 1 region of the full-length NM\_153022.2 mRNA transcript (Supplementary Table S1). The PCR product was subjected to Sanger sequencing to determine the presence or absence of mutations. All the mutations were confirmed at least twice, and the sequence tracings were reviewed in the forward and reverse directions by visual inspection.

### Statistical analyses

All the statistical analyses were carried out using the SPSS 18.0 statistical software package.  $\chi^2$  tests were used to compare the expression rates of C12orf59 in ccRCC and their adjacent normal kidney tissues and to determine the associations between the expression of C12orf59, HIF1 $\alpha$ , HIF2 $\alpha$ , and *VHL* mutation status and the clinicopathological parameters. The bivariate correlations between the variables were calculated by Spearman's correlation coefficients. The multivariate analysis of the relative effect on survival of each parameter included in the univariate analysis was estimated using the Cox proportional hazards regression model. The overall survival rates were determined according to the Kaplan–Meier method and compared using the log-rank test.  $P < 0.05$  was statistically significant.

### ACKNOWLEDGMENTS AND FUNDING

Our work was supported by grants from the National Natural Science Foundation of China (Grant No. 81272840, 81472584), the National Key Scientific Program of China (Grant No. 2014CBA02005), Shenzhen Project of Science and Technology (Grant No. 20140416180149160, 201206133000192).

### CONFLICTS OF INTEREST

The authors have no conflicts of interest to declare.

### REFERENCES

1. Siegel R, Naishadham D, Jemal A. Cancer statistics, 2012. *CA Cancer J Clin.* 2012; 62:10–29.
2. Sun M, Thuret R, Abdollah F, Lughezzani G, Schmitges J, Tian Z, Shariat SF, Montorsi F, Patard JJ, Perrotte P, Karakiewicz PI. Age-adjusted incidence, mortality, and survival rates of stage-specific renal cell carcinoma in North America: a trend analysis. *Eur Urol.* 2011; 59:135–141.
3. Motzer RJ, Agarwal N, Beard C, Bhayani S, Bolger GB, Carducci MA, Chang SS, Choueiri TK, Hancock SL, Hudes GR, Jonasch E, Josephson D, Kuzel TM, et al. *Kidney Cancer.* *J Natl Compr Canc Ne.* 2011; 9:960–977.
4. Cohen HT, McGovern FJ. Renal-cell carcinoma. *The N Engl J Med.* 2005; 353:2477–2490.
5. Patil S, Ishill N, Deluca J, Motzer RJ. Stage migration and increasing proportion of favorable-prognosis metastatic renal cell carcinoma patients: implications for clinical trial design and interpretation. *Cancer.* 2010; 116:347–354.
6. Larkin J, Goh XY, Vetter M, Pickering L, Swanton C. Epigenetic regulation in RCC: opportunities for therapeutic intervention? *Nat Rev Urol.* 2012; 9:147–155.
7. Latif F, Tory K, Gnarr J, Yao M, Duh FM, Orcutt ML, Stackhouse T, Kuzmin I, Modi W, Geil L, et al. Identification

of the von Hippel-Lindau disease tumor suppressor gene. *Science*. 1993; 260:1317–1320.

8. Gnarr JR, Tory K, Weng Y, Schmidt L, Wei MH, Li H, Latif F, Liu S, Chen F, Duh FM, et al. Mutations of the VHL tumour suppressor gene in renal carcinoma. *Nat Genet*. 1994; 7:85–90.
9. Nickerson ML, Jaeger E, Shi Y, Durocher JA, Mahurkar S, Zaridze D, Matveev V, Janout V, Kollarova H, Bencko V, Navratilova M, Szeszenia-Dabrowska N, Mates D, et al. Improved identification of von Hippel-Lindau gene alterations in clear cell renal tumors. *Clin Cancer Res*. 2008; 14:4726–4734.
10. Metelo AM, Noonan H, Iliopoulos O. HIF2a inhibitors for the treatment of VHL disease. *Oncotarget*. 2015; 6:23036–23037. doi: 10.18632/oncotarget.4564.
11. Frew IJ, Krek W. pVHL: a multipurpose adaptor protein. *Sci Signal*. 2008; 1:pe30.
12. Dalgliesh GL, Furge K, Greenman C, Chen L, Bignell G, Butler A, Davies H, Edkins S, Hardy C, Latimer C, Teague J, Andrews J, Barthorpe S, et al. Systematic sequencing of renal carcinoma reveals inactivation of histone modifying genes. *Nature*. 2010; 463:360–363.
13. van Haafden G, Dalgliesh GL, Davies H, Chen L, Bignell G, Greenman C, Edkins S, Hardy C, O'Meara S, Teague J, Butler A, Hinton J, Latimer C, et al. Somatic mutations of the histone H3K27 demethylase gene UTX in human cancer. *Nat Genet*. 2009; 41:521–523.
14. Varela I, Tarpey P, Raine K, Huang D, Ong CK, Stephens P, Davies H, Jones D, Lin ML, Teague J, Bignell G, Butler A, Cho J, et al. Exome sequencing identifies frequent mutation of the SWI/SNF complex gene PBRM1 in renal carcinoma. *Nature*. 2011; 469:539–542.
15. Pena-Llopis S, Vega-Rubin-de-Celis S, Liao A, Leng N, Pavia-Jimenez A, Wang S, Yamasaki T, Zhrebker L, Sivanand S, Spence P, Kinch L, Hambuch T, Jain S, et al. BAP1 loss defines a new class of renal cell carcinoma. *Nat Genet*. 2012; 44:751–759.
16. Kapur P, Pena-Llopis S, Christie A, Zhrebker L, Pavia-Jimenez A, Rathmell WK, Xie XJ, Brugarolas J. Effects on survival of BAP1 and PBRM1 mutations in sporadic clear-cell renal-cell carcinoma: a retrospective analysis with independent validation. *Lancet Oncol*. 2013; 14:159–167.
17. von Roemeling CA, Marlow LA, Wei JJ, Cooper SJ, Caulfield TR, Wu K, Tan WW, Tun HW, Copland JA. Stearoyl-CoA desaturase 1 is a novel molecular therapeutic target for clear cell renal cell carcinoma. *Clin Cancer Res*. 2013; 19:2368–2380.
18. Lu D, Dong D, Zhou Y, Lu M, Pang XW, Li Y, Tian XJ, Zhang Y, Zhang J. The tumor-suppressive function of UNC5D and its repressed expression in renal cell carcinoma. *Clin Cancer Res*. 2013; 19:2883–2892.
19. Xiao H, Zeng J, Li H, Chen K, Yu G, Hu J, Tang K, Zhou H, Huang Q, Li A, Li Y, Ye Z, Wang J, et al. MiR-1 downregulation correlates with poor survival in clear cell renal cell carcinoma where it interferes with cell cycle regulation and metastasis. *Oncotarget*. 2015; 6:13201–13215. doi: 10.18632/oncotarget.3915.
20. Chen K, Yu G, Gumireddy K, Li A, Yao W, Gao L, Chen S, Hao J, Wang J, Huang Q, Xu H, Ye Z. ZBRK1, a novel tumor suppressor, activates VHL gene transcription through formation of a complex with VHL and p300 in renal cancer. *Oncotarget*. 2015; 6:6959–6976. doi: 10.18632/oncotarget.3134.
21. Ghosh AP, Marshall CB, Coric T, Shim EH, Kirkman R, Ballestas ME, Ikura M, Bjornsti MA, Sudarshan S. Point mutations of the mTOR-RHEB pathway in renal cell carcinoma. *Oncotarget*. 2015; 6:17895–17910. doi: 10.18632/oncotarget.4963.
22. Ota T, Suzuki Y, Nishikawa T, Otsuki T, Sugiyama T, Irie R, Wakamatsu A, Hayashi K, Sato H, Nagai K, Kimura K, Makita H, Sekine M, et al. Complete sequencing and characterization of 21,243 full-length human cDNAs. *Nat Genet*. 2004; 36:40–45.
23. Strausberg RL, Feingold EA, Grouse LH, Derge JG, Klausner RD, Collins FS, Wagner L, Shenmen CM, Schuler GD, Altschul SF, Zeeberg B, Buetow KH, Schaefer CF, et al. Generation and initial analysis of more than 15,000 full-length human and mouse cDNA sequences. *Proc Natl Acad Sci USA*. 2002; 99:16899–16903.
24. Abdelmohsen K, Srikantan S, Yang X, Lal A, Kim HH, Kuwano Y, Galban S, Becker KG, Kamara D, de Cabo R, Gorospe M. Ubiquitin-mediated proteolysis of HuR by heat shock. *EMBO J*. 2009; 28:1271–1282.
25. Clark HF, Gurney AL, Abaya E, Baker K, Baldwin D, Brush J, Chen J, Chow B, Chui C, Crowley C, Currell B, Deuel B, Dowd P, et al. The secreted protein discovery initiative (SPDI), a large-scale effort to identify novel human secreted and transmembrane proteins: a bioinformatics assessment. *Genome Res*. 2003; 13:2265–2270.
26. Gerhard DS, Wagner L, Feingold EA, Shenmen CM, Grouse LH, Schuler G, Klein SL, Old S, Rasooly R, Good P, Guyer M, Peck AM, Derge JG, et al. The status, quality, and expansion of the NIH full-length cDNA project: the Mammalian Gene Collection (MGC). *Genome Res*. 2004; 14:2121–2127.
27. Zhou L, Chen J, Li Z, Li X, Hu X, Huang Y, Zhao X, Liang C, Wang Y, Sun L, Shi M, Xu X, Shen F, et al. Integrated profiling of microRNAs and mRNAs: microRNAs located on Xq27.3 associate with clear cell renal cell carcinoma. *PLoS one*. 2010; 5:e15224.
28. Yusenko MV, Kuiper RP, Boethe T, Ljungberg B, van Kessel AG, Kovacs G. High-resolution DNA copy number and gene expression analyses distinguish chromophobe renal cell carcinomas and renal oncocytomas. *BMC cancer*. 2009; 9:152.
29. Lenburg ME, Liou LS, Gerry NP, Frampton GM, Cohen HT, Christman MF. Previously unidentified changes in renal cell carcinoma gene expression identified by parametric analysis of microarray data. *BMC cancer*. 2003; 3:31.

30. Guo G, Gui Y, Gao S, Tang A, Hu X, Huang Y, Jia W, Li Z, He M, Sun L, Song P, Sun X, Zhao X, et al. Frequent mutations of genes encoding ubiquitin-mediated proteolysis pathway components in clear cell renal cell carcinoma. *Nat Genet.* 2011; 44:17–19.
31. Rhodes DR, Kalyana-Sundaram S, Mahavisno V, Varambally R, Yu J, Briggs BB, Barrette TR, Anstet MJ, Kincead-Beal C, Kulkarni P, Varambally S, Ghosh D, Chinnaiyan AM. OncoPrint 3.0: genes, pathways, and networks in a collection of 18,000 cancer gene expression profiles. *Neoplasia.* 2007; 9:166–180.
32. Roe JS, Kim H, Lee SM, Kim ST, Cho EJ, Youn HD. p53 stabilization and transactivation by a von Hippel-Lindau protein. *Mol Cell.* 2006; 22:395–405.
33. Mandriota SJ, Turner KJ, Davies DR, Murray PG, Morgan NV, Sowter HM, Wykoff CC, Maher ER, Harris AL, Ratcliffe PJ, Maxwell PH. HIF activation identifies early lesions in VHL kidneys: evidence for site-specific tumor suppressor function in the nephron. *Cancer Cell.* 2002; 1:459–468.
34. Montani M, Heinemann K, von Teichman A, Rudolph T, Perren A, Moch H. VHL-gene deletion in single renal tubular epithelial cells and renal tubular cysts: further evidence for a cyst-dependent progression pathway of clear cell renal carcinoma in von Hippel-Lindau disease. *Am J Surg Pathol.* 2010; 34:806–815.
35. Livak KJ, Schmittgen TD. Analysis of relative gene expression data using real-time quantitative PCR and the 2(-Delta Delta C(T)) Method. *Methods.* 2001; 25:402–408.
36. Li Z, Chim JC, Yang M, Ye J, Wong BC, Qiao L. Role of PCDH10 and its hypermethylation in human gastric cancer. *Mol Cell Res.* 2011; 1823:298–305.
37. Spizzo G, Fong D, Wurm M, Ensinger C, Obrist P, Hofer C, Mazzoleni G, Gastl G, Went P. EpCAM expression in primary tumour tissues and metastases: an immunohistochemical analysis. *J Clin Pathol.* 2011; 64:415–420.
